# Supplementary material for: “Keep Your Chin Up, and Keep Eating”: Perceptions of Barriers and Facilitators to Healthful Dietary Behaviors Among Individuals With Gastrointestinal Cancer and Caregivers
Source: PubMed Central journal article supplement — Cancer Control. 2023 Nov 1;30:10732748231208316. doi: 10.1177/10732748231208316 (PMC10623986; doi:10.1177/10732748231208316), 2023-11-01
Supplement: sj-pdf-2-ccx-10.1177_10732748231208316.pdf [file sj-pdf-2-ccx-10.1177_10732748231208316.pdf]

**Supplementary Table 2. Healthy Eating Index-2020 (HEI-2020) component scores for patients with gastrointestinal (GI) cancer and caregivers**

| <b>HEI 2020 Total and Component Scores</b> | <b>Maximum Possible Score</b> | <b>Patients (N=27)<br/>Median (Range)</b> | <b>Caregivers (N=27)<br/>Median (Range)</b> |
|--------------------------------------------|-------------------------------|-------------------------------------------|---------------------------------------------|
| <b>Total Fruits</b>                        | 5                             | 1.0 (0.0, 4.0)                            | 1.00 (0.0, 4.0)                             |
| <b>Whole Fruits</b>                        | 5                             | 1.0 (0.0, 5.0)                            | 1.0 (0.0, 5.0)                              |
| <b>Total Vegetables</b>                    | 5                             | 2.0 (0.0, 5.0)                            | 2.0 (0.0, 4.0)                              |
| <b>Greens &amp; Beans</b>                  | 5                             | 2.0 (0.0, 5.0)                            | 2.0 (0.0, 5.0)                              |
| <b>Whole Grains</b>                        | 10                            | 1.0 (0.0, 10.0)                           | 2.0 (0.0, 10.0)                             |
| <b>Dairy</b>                               | 10                            | 6.0 (2.0, 10.0)                           | 5.0 (1.0, 10.0)                             |
| <b>Total Protein Foods</b>                 | 5                             | 3.0 (1.0, 5.0)                            | 4.0 (2.0, 5.0)                              |
| <b>Seafood &amp; Plant Proteins</b>        | 5                             | 3.0 (0.0, 5.0)                            | 3.0 (0.0, 5.0)                              |
| <b>Unsaturated Fatty Acids</b>             | 10                            | 0.0 (0.0, 9.0)                            | 0.0 (0.0, 10.0)                             |
| <b>Refined grains</b>                      | 10                            | 9.0 (0.0, 10.0)                           | 7.0 (0.0, 10.0)                             |
| <b>Sodium</b>                              | 10                            | 3.0 (0.0, 9.0)                            | 4.0 (0.0, 10.0)                             |
| <b>Added Sugars</b>                        | 10                            | 7.0 (0.0, 10.0)                           | 7.0 (0.0, 10.0)                             |
| <b>Saturated Fats</b>                      | 10                            | 5.0 (0.0, 10)                             | 6.0 (0.0, 10.0)                             |
| <b>Total HEI Score</b>                     | 100                           | 43.0 (26.0, 81.0)                         | 42.0 (33.0, 73.0)                           |

Note: The HEI-2020 score has 13 components – foods to have adequate consumption of: total fruit, whole fruit, total vegetables, green vegetables and beans, whole grains, milk/dairy, total protein foods, seafood and plant proteins and unsaturated fatty acids; and moderate consumption of refined grains, sodium, added sugars and saturated fats.<sup>30</sup> Higher scores for refined grains, sodium, added sugars and saturated fats reflect lower intakes. Each participants' HEI-2020 score was calculated from the mean intake values of the three dietary recalls; score range from 0 to 100.
